# Supplementary material for: Poverty and Influenza/Pneumococcus Vaccinations in Older People: Data from The Survey of Health, Ageing and Retirement in Europe (SHARE) Study
Source: MDPI journal article supplement (doi:10.3390/vaccines11091422), 2023-08-27
Supplement: s1 [file s1]

Supplementary Table S1. Descriptive statistics by influenza vaccination, *Poor* respondents

| Variable                                       | Influenza vaccination<br>(n= 4,424) |          | No Influenza vaccination<br>(n= 8,018) |          | p-value |
|------------------------------------------------|-------------------------------------|----------|----------------------------------------|----------|---------|
| Gender (female) (%)                            | 62.66                               |          | 66.67                                  |          | <0.0001 |
| Couple (%)                                     | 58.43                               |          | 49.73                                  |          | <0.0001 |
| Mean age (SD)                                  | 74.27                               | (8.71)   | 70.71                                  | (9.42)   | <0.0001 |
| Mean years of education (SD)                   | 9.53                                | (4.14)   | 9.89                                   | (3.78)   | <0.0001 |
| Mean household size (SD)                       | 2.05                                | (1.06)   | 2.19                                   | (1.31)   | <0.0001 |
| Employed/self-employed (%)                     | 5.83                                |          | 10.95                                  |          | <0.0001 |
| Make ends Meet                                 |                                     |          |                                        |          |         |
| 1 - With great difficulty (%)                  | 17.65                               |          | 20.92                                  |          | <0.0001 |
| 2 - With some difficulty (%)                   | 29.86                               |          | 34.92                                  |          |         |
| 3 - Fairly easily (%)                          | 32.78                               |          | 31.08                                  |          |         |
| 4 - Easily (%)                                 | 19.71                               |          | 13.08                                  |          |         |
| Regularly taking prescription drugs (%)        | 88.65                               |          | 75.16                                  |          | <0.0001 |
| Self-perceived health                          |                                     |          |                                        |          |         |
| 1 - Excellent (%)                              | 3.98                                |          | 4.73                                   |          | <0.0001 |
| 2 - Very good (%)                              | 11.48                               |          | 12.40                                  |          |         |
| 3 - Good (%)                                   | 43.49                               |          | 43.54                                  |          |         |
| 4 - Fair (%)                                   | 31.76                               |          | 30.93                                  |          |         |
| 5 - Poor (%)                                   | 9.29                                |          | 8.41                                   |          |         |
| Mean household monthly income €                | 1,166.55                            | (727.45) | 895.88                                 | (736.35) | <0.0001 |
| Mean number of illnesses and health conditions | 1.72                                | (1.17)   | 1.45                                   | (1.19)   | <0.0001 |
| Hip fracture (%)                               | 3.66                                |          | 2.96                                   |          | <0.0001 |
| Diabetes/high blood sugar (%)                  | 24.21                               |          | 17.67                                  |          |         |
| High blood pressure/hyp. (%)                   | 59.29                               |          | 51.15                                  |          |         |
| Heart attack (%)                               | 22.45                               |          | 19.44                                  |          |         |
| Chronic lung disease (%)                       | 10.99                               |          | 7.27                                   |          |         |
| Cancer or malignant tumour (%)                 | 7.03                                |          | 5.30                                   |          |         |
| Other illness/health condition (%)             | 44.33                               |          | 41.72                                  |          |         |

Supplementary Table S2. Descriptive statistics by pneumonia vaccination, *Poor* respondents (excluding Romania and Slovakia)

| Variable                                       | Pneumonia vacc.<br>(n= 1,527) |          | No Pneumonia<br>vaccination (n= 10,333) |          | p-value |
|------------------------------------------------|-------------------------------|----------|-----------------------------------------|----------|---------|
| Gender (female) (%)                            | 63.72                         |          | 65.46                                   |          | 0.1864  |
| Couple (%)                                     | 57.56                         |          | 52.21                                   |          | 0.0001  |
| Mean age (SD)                                  | 74.29                         | (8.09)   | 71.85                                   | (9.41)   | <0.0001 |
| Mean years of education (SD)                   | 10.24                         | (4.25)   | 9.71                                    | (3.90)   | <0.0001 |
| Mean household size (SD)                       | 1.93                          | (0.95)   | 2.14                                    | (1.24)   | <0.0001 |
| Employed/self-employed (%)                     | 6.35                          |          | 9.63                                    |          | <0.0001 |
| Make ends Meet                                 |                               |          |                                         |          |         |
| 1 - With great difficulty (%)                  | 18.34                         |          | 18.80                                   |          | <0.0001 |
| 2 - With some difficulty (%)                   | 23.44                         |          | 34.04                                   |          |         |
| 3 - Fairly easily (%)                          | 31.04                         |          | 32.65                                   |          |         |
| 4 - Easily (%)                                 | 27.18                         |          | 14.51                                   |          |         |
| Regularly taking prescription drugs (%)        | 89.98                         |          | 79.05                                   |          | <0.0001 |
| Self-perceived health                          |                               |          |                                         |          |         |
| 1 - Excellent (%)                              | 4.06                          |          | 4.62                                    |          | <0.0001 |
| 2 - Very good (%)                              | 15.26                         |          | 11.64                                   |          |         |
| 3 - Good (%)                                   | 40.14                         |          | 43.41                                   |          |         |
| 4 - Fair (%)                                   | 30.39                         |          | 31.87                                   |          |         |
| 5 - Poor (%)                                   | 10.15                         |          | 8.46                                    |          |         |
| Mean household monthly income €                | 1,272.72                      | (711.10) | 987.80                                  | (745.04) | <0.0001 |
| Mean number of illnesses and health conditions | 1.83                          | (1.21)   | 1.52                                    | (1.18)   | <0.0001 |
| Hip fracture (%)                               | 4.65                          |          | 3.02                                    |          | <0.0001 |
| Diabetes/high blood sugar (%)                  | 24.75                         |          | 19.40                                   |          |         |
| High blood pressure/hyp. (%)                   | 59.40                         |          | 53.31                                   |          |         |
| Heart attack (%)                               | 23.71                         |          | 20.24                                   |          |         |
| Chronic lung disease (%)                       | 17.94                         |          | 7.40                                    |          |         |
| Cancer or malignant tumour (%)                 | 9.30                          |          | 5.56                                    |          |         |
| Other illness/health condition (%)             | 43.09                         |          | 42.88                                   |          |         |
